# Supplementary material for: Mental health resilience in offspring of depressed parents: a systematic literature review protocol
Source: Springer Nature journal article supplement (doi:10.1186/s13643-022-02056-6), 2022-09-05
Supplement: MOESM3 [file 13643_2022_2056_MOESM3_ESM.pdf]

## **Mental health resilience in offspring of depressed parents: a systematic literature review**

Electronic searches were performed on 15<sup>th</sup> March 2021.

### **Search strategies by database**

Database: APA PsycInfo <1806 to March Week 2 2021>

Search Strategy:

- 
- 1 exp Caregivers/ (29980)
  - 2 exp Parents/ (120534)
  - 3 exp Affective Disorders/ (149496)
  - 4 exp Major Depression/ (136988)
  - 5 exp Offspring/ (16831)
  - 6 exp "Resilience (Psychological)"/ (15395)
  - 7 exp Protective Factors/ (6050)
  - 8 exp "Literature Review"/ (23361)
  - 9 exp "Systematic Review"/ (545)
  - 10 exp Meta Analysis/ (4924)
  - 11 exp Qualitative Methods/ (16738)
  - 12 (caregiver\* or parent\* or maternal or paternal or mother\* or father\*).ab,id,ot,ti. (432110)

- 13 (depress\* or (affective adj2 disorder\*) or (mood adj2 disorder\*)).ab,id,ot,ti. (335164)
- 14 (offspring\* or child\* or son\* or daughter\*).ab,id,ot,ti. (775618)
- 15 (resilien\* or protect\* or buffer\* or (mitigat\* adj2 risk) or (optimi\* adj2 outcome\*) or (adapt\* adj2 functioning) or thrive\* or (positive adj2 adapt\*)).ab,id,ot,ti. (157773)
- 16 (review\* or comment\* or letter or metaanalysis or meta-analysis or (meta adj2 analysis) or editorial or (conference adj2 publication) or qualitative).ab,id,ot,ti. (905449)
- 17 1 or 2 or 12 (438728)
- 18 3 or 4 or 13 (339691)
- 19 5 or 14 (776838)
- 20 6 or 7 or 15 (158549)
- 21 8 or 9 or 10 or 11 or 16 (910145)
- 22 17 and 18 and 19 and 20 (2444)
- 23 22 not 21 (2102)

\*\*\*\*\*

Database: EMBASE <1947-Present>

Search Strategy:

- 
- 1 exp caregiver/ (88034)
  - 2 exp parent/ (292791)
  - 3 exp depression/ (511079)
  - 4 exp mood disorder/ (556439)
  - 5 exp psychological resilience/ (4818)
  - 6 exp child/ (3137100)
  - 7 exp "review"/ (2801432)
  - 8 exp "systematic review"/ (289282)
  - 9 exp meta analysis/ (212275)
  - 10 exp conference paper/ (1968054)
  - 11 exp qualitative research/ (86495)
  - 12 (caregiver\* or parent\* or maternal or paternal or mother\* or father\*).ab,kw,ot,ti. (1193552)
  - 13 (depress\* or (affective adj2 disorder\*) or (mood adj2 disorder\*)).ab,kw,ot,ti. (719616)
  - 14 (offspring\* or child\* or son\* or daughter\*).ab,kw,ot,ti. (2425485)
  - 15 (resilien\* or protect\* or buffer\* or (mitigat\* adj2 risk) or (optimi\* adj2 outcome\*) or (adapt\* adj2 functioning) or thrive\* or (positive adj2 adapt\*)).ab,kw,ot,ti. (1385648)

16 (review\* or comment\* or letter or metaanalysis or meta-analysis or (meta adj2 analysis) or editorial or (conference adj2 publication) or qualitative).ab,kw,ot,ti. (3779086)

17 1 or 2 or 12 (1250118)

18 3 or 4 or 13 (907089)

19 5 or 15 (1386501)

20 6 or 14 (4037790)

21 7 or 8 or 9 or 10 or 11 or 16 (7049614)

22 17 and 18 and 19 and 20 (3181)

23 22 not 21 (2372)

\*\*\*\*\*

Database: Ovid MEDLINE(R) ALL <1946 to March 14, 2021>

Search Strategy:

- 
- 1 exp Parents/ (117476)
  - 2 exp Caregivers/ (38846)
  - 3 exp Mood Disorders/ (124775)
  - 4 exp Depression/ (125189)
  - 5 exp Child/ (1950649)
  - 6 exp Resilience, Psychological/ (6546)
  - 7 exp Protective Factors/ (4858)
  - 8 exp "Systematic Review"/ (147716)
  - 9 exp "Review"/ (2777286)
  - 10 exp Meta-Analysis/ (128007)
  - 11 exp Qualitative Research/ (61005)
  - 12 (caregiver\* or parent\* or maternal or paternal or mother\* or father\*).ab,kw,ot,ti. (872245)
  - 13 (depress\* or (affective adj2 disorder\*) or (mood adj2 disorder\*)).ab,kw,ot,ti. (500597)
  - 14 (offspring\* or child\* or son\* or daughter\*).ab,kw,ot,ti. (1705576)
  - 15 (resilien\* or protect\* or buffer\* or (mitigat\* adj2 risk) or (optimi\* adj2 outcome\*) or (adapt\* adj2 functioning) or thrive\* or (positive adj2 adapt\*)).ab,kw,ot,ti. (1047985)

16 (review\* or comment\* or letter or metaanalysis or meta-analysis or (meta adj2 analysis) or editorial or (conference adj2 publication) or qualitative).ab,kw,ot,ti. (2800834)

17 1 or 2 or 12 (903889)

18 3 or 4 or 13 (545540)

19 5 or 14 (2698778)

20 6 or 7 or 15 (1051349)

21 8 or 9 or 10 or 11 or 16 (4358303)

22 17 and 18 and 19 and 20 (1971)

23 22 not 21 (1665)

\*\*\*\*\*

Database: Web of Science Core Collection

Search Strategy:

- |     |           |                                                                                                                                                                                                                                                                    |
|-----|-----------|--------------------------------------------------------------------------------------------------------------------------------------------------------------------------------------------------------------------------------------------------------------------|
| # 7 | 3,193     | #6 NOT #5<br><br><i>Indexes=SCI-EXPANDED, SSCI, A&amp;HCI, CPCI-S, CPCI-SSH, ESCI Timespan=All years</i>                                                                                                                                                           |
| # 6 | 3,782     | #4 AND #3 AND #2 AND #1<br><br><i>Indexes=SCI-EXPANDED, SSCI, A&amp;HCI, CPCI-S, CPCI-SSH, ESCI Timespan=All years</i>                                                                                                                                             |
| # 5 | 4,109,336 | TS= (review* or comment* or letter or metaanalysis or meta-analysis or (meta near/1 analysis) or editorial or (conference near/1 publication) or qualitative)<br><br><i>Indexes=SCI-EXPANDED, SSCI, A&amp;HCI, CPCI-S, CPCI-SSH, ESCI Timespan=All years</i>       |
| # 4 | 1,874,835 | TS=(resilien* or protect* or buffer* or (mitigat* near/1 risk) or (optimi* near/1 outcome*) or (adapt* near/1 functioning) or thrive* or (positive near/1 adapt*) )<br><br><i>Indexes=SCI-EXPANDED, SSCI, A&amp;HCI, CPCI-S, CPCI-SSH, ESCI Timespan=All years</i> |
| # 3 | 2,611,007 | TS=(offspring* or child* or son* or daughter*)<br><br><i>Indexes=SCI-EXPANDED, SSCI, A&amp;HCI, CPCI-S, CPCI-SSH, ESCI Timespan=All years</i>                                                                                                                      |
| # 2 | 682,647   | TS=(depress* or (affective near/1 disorder*) or (mood near/1 disorder*) )                                                                                                                                                                                          |

*Indexes=SCI-EXPANDED, SSCI, A&HCI, CPCI-S, CPCI-SSH, ESCI Timespan=All  
years*

# 1      1,131,940      TS=(caregiver\* or parent\* or maternal or paternal or mother\* or father\*)

*Indexes=SCI-EXPANDED, SSCI, A&HCI, CPCI-S, CPCI-SSH, ESCI Timespan=All  
years*



Database: Cochrane Library

Search Strategy:

| ID  | Search                                                                           | Hits   |
|-----|----------------------------------------------------------------------------------|--------|
| #1  | MeSH descriptor: [Caregivers] explode all trees                                  | 2167   |
| #2  | MeSH descriptor: [Depression] explode all trees                                  | 12583  |
| #3  | MeSH descriptor: [Mood Disorders] explode all trees                              | 13121  |
| #4  | MeSH descriptor: [Child] explode all trees                                       | 56688  |
| #5  | MeSH descriptor: [Resilience, Psychological] explode all trees                   | 249    |
| #6  | MeSH descriptor: [Protective Factors] explode all trees                          | 127    |
| #7  | MeSH descriptor: [Review] explode all trees                                      | 2      |
| #8  | MeSH descriptor: [Meta-Analysis as Topic] explode all trees                      | 329    |
| #9  | MeSH descriptor: [Systematic Reviews as Topic] explode all trees                 | 26     |
| #10 | MeSH descriptor: [Congresses as Topic] explode all trees                         | 29     |
| #11 | MeSH descriptor: [Qualitative Research] explode all trees                        | 1105   |
| #12 | ((caregiver* or parent* or maternal or paternal or mother* or father*)):ti,ab,kw | 84326  |
| #13 | ((depress* or (affective near/1 disorder*) or (mood near/1 disorder*)):ti,ab,kw  | 90405  |
| #14 | ((offspring* or child* or son* or daughter*)):ti,ab,kw                           | 174791 |

#15 ((resilien\* or protect\* or buffer\* or (mitigat\* near/1 risk) or (optimi\* near/1 outcome\*) or (adapt\* near/1 functioning) or thriv\* or (positive near/1 adapt\*)):ti,ab,kw 47840

#16 ((review\* or comment\* or letter or metaanalysis or meta-analysis or (meta near/1 analysis) or editorial or (conference near/1 publication) or qualitative)):ti,ab,kw 117477

#17 #1 OR #12 84326

#18 #2 OR #3 OR #13 90436

#19 #4 OR #14 174791

#20 #5 OR #6 OR #15 47840

#21 #7 OR #8 OR #9 OR #10 OR #11 OR #16 117499

#22 #17 AND #18 AND #19 AND #20 333

#23 #22 NOT #21 262
